# Supplementary material for: Identify QTLs for grain size and weight in common wild rice using chromosome segment substitution lines across six environments
Source: PubMed Central journal article supplement — Breed Sci. 2017 Nov 15;67(5):472–82. doi: 10.1270/jsbbs.16082 (PMC5790038; doi:10.1270/jsbbs.16082), 2017-11-15
Supplement: 67_16082_1.pdf [file 67_16082_1.pdf]

**Supplemental Table 1.** SSR and InDel markers used in this study

| Locus name | Chromosome | Physical location (Mb) | Forward primer            | Reverse primer             |
|------------|------------|------------------------|---------------------------|----------------------------|
| RM3740     | 1          | 2.80                   | cccgtcaccaactcacatagg     | ctaagccacccttaccacatcc     |
| Indel1-3   | 1          | 5.30                   | gggaaattgggaggaagac       | cgagcaagctaccgaatta        |
| RM1201     | 1          | 7.16                   | gtactgtacgagccctagttaccg  | taccgcgccacatatacacaacc    |
| RM243      | 1          | 7.97                   | gatctgcagactgcagttgc      | agctgcaacgatgtgtcc         |
| RM577      | 1          | 8.37                   | gcttccctctaaccctct        | ggatgtaccgctgacatgaa       |
| RM449      | 1          | 15.12                  | ttgggaggtgtgataaggc       | accaccagegtctctctctc       |
| Indel1-9   | 1          | 20.06                  | tcccctctccactgtcaac       | tttttagtgcatagatcctcttc    |
| Indel1-10  | 1          | 22.62                  | gttcaggcaattccatcggt      | ctaattcgcaaacgaatct        |
| RM5        | 1          | 23.97                  | tgcaacttctagctgctcga      | gcatccgatcttgatggg         |
| RM488      | 1          | 24.81                  | cagctaggggtttgaggctg      | tagcaacaaccagcgtatgc       |
| RM128      | 1          | 30.74                  | agcttgggtgatttcttggaaagcg | acgacgaggagtcgccgtgcag     |
| RM543      | 1          | 32.78                  | ctgctgcagactctactgcg      | aaatattaccatccccccc        |
| Indel1-16  | 1          | 37.71                  | ttcatatccgcaggcaattt      | gccttctgttcatggcagt        |
| RM14       | 1          | 41.36                  | ccgaggagaggagttcgac       | gtgccaatttctcgaaaaa        |
| RM109      | 2          | 0.18                   | gccgccggagagggagagagag    | ccccgacgggatctccatcgtc     |
| RM110      | 2          | 1.33                   | tgaagccatccaccaacgaag     | tccgtacgccgacgaggtcgag     |
| RM236      | 2          | 2.10                   | gcgctggtgaaaaatgag        | ggcatcccttttgattctc        |
| RM555      | 2          | 4.31                   | ttggatcagccaaaggagac      | cagcattgtggcatggatc        |
| Indel2-3   | 2          | 5.48                   | atagggtgggtgtgctgaac      | gcacaaaactgcaggctcc        |
| Indel2-4   | 2          | 7.99                   | agtgtccaagcgagaaaac       | atgcacgagtgtggtgagc        |
| RM7288     | 2          | 9.03                   | cgctatgtggcagtttaagagc    | ctgttggaatcaaagtgtgagc     |
| RM324      | 2          | 11.39                  | ctgattccacacactgtgc       | gattccacgtcaggatcttc       |
| Indel2-8   | 2          | 18.09                  | ccatcagcatcagcaatagg      | gaatatgtgtggagaccaatatatga |
| RM29       | 2          | 19.46                  | cagggaccacctgtcatac       | aacgttggcatatcgggtgg       |
| Indel2-9   | 2          | 20.58                  | ttttatctcgaggtacggtagtag  | tgagaattagtgttcattgtagattc |
| RM262      | 2          | 20.79                  | cattccgtctcggctcaact      | cagagcaaggtggcttgc         |
| RM5427     | 2          | 21.52                  | tgctgttgacacttgacaggtagc  | cacaattatcgcgctcatcg       |
| Indel2-10  | 2          | 23.05                  | ggctggctgttctcatc         | aaaaatccaaccctgctg         |
| RM6318     | 2          | 24.43                  | aagtgcctcgaattacacatctcc  | gctgctctgtccagtgtgagacc    |
| Indel2-11  | 2          | 25.57                  | aaggagattagcagttggtgga    | tccaatttgacacaaatgatga     |
| RM525      | 2          | 28.27                  | ggcccgccaagaaatattg       | cggtgagacagaatccttaccg     |
| RM240      | 2          | 31.50                  | ccttaatgggtagtgtgcac      | tgtaacattccttccatcc        |
| RM250      | 2          | 32.78                  | ggttcaaccaagctgatca       | gatgaaggccttccacgcag       |
| Indel2-14  | 2          | 33.07                  | agtgaattttgagcccaacg      | taaaagcaaaaggccgaaaaa      |
| RM482      | 2          | 35.28                  | tctgaaagcctgactcatcg      | gtcaattgcagtgcccttcc       |
| RM535      | 2          | 35.78                  | actacatacacggcccttgc      | ctacgtggacaccgtcacac       |
| RM523      | 3          | 1.32                   | aaggcattgcagctagaagc      | gcacttgggaggttctgtag       |
| Indel3-3   | 3          | 1.73                   | tgtttatattggaacggagga     | gttacctgcccttctgcagt       |
| Indel3-4   | 3          | 1.74                   | gcttaccacacctctctctc      | tccatagtcttcttctcca        |
| Indel3-6   | 3          | 2.88                   | gtttacgaatgaaccagt        | ctcattgaggcaaaaggac        |
| Indel3-8   | 3          | 3.89                   | taatttcggctcatccaagc      | gaagctccgcaggttaccg        |

|           |   |       |                           |                         |
|-----------|---|-------|---------------------------|-------------------------|
| Indel3-11 | 3 | 5.65  | ggaatccctcccttcttgc       | ggcggtaaagacgggtaaa     |
| RM517     | 3 | 6.17  | ggcttactggcttcgattg       | cgtctcctttggtagtgcc     |
| Indel3-13 | 3 | 8.00  | gccattgatcttctgcaggt      | ttgttgtaaatgccctgtt     |
| Indel3-16 | 3 | 14.04 | cgacgctgtgatcctgtta       | gaaattaagcagcggagca     |
| Indel3-17 | 3 | 16.05 | gcatccatggttgagattcc      | tgcgctgctaaatgaaaaga    |
| RM411     | 3 | 21.43 | acaccaactcttgcctgcat      | tgaagcaaaaacatggctagg   |
| RM347     | 3 | 26.74 | caacctaaactttaaccgcac     | tccggcaagggtatcggcgg    |
| Indel3-25 | 3 | 26.88 | gttaggcctgcacttttga       | gacatcaatcttggggagga    |
| Indel3-26 | 3 | 27.37 | gtgatggtgaggggatctca      | atccctcctccttctgtg      |
| RM426     | 3 | 27.59 | atgagatgagttcaaggccc      | aactctgtacctccatcgcc    |
| Indel3-27 | 3 | 28.37 | tgggctattattgggctttg      | cgtgggataaaaccaccaag    |
| RM55      | 3 | 29.05 | ccgtcgccgtagtagagaag      | tccgggtattttaaggcg      |
| RM520     | 3 | 30.92 | aggagcaagaaaagtcccc       | gccaatgtgtgacgcaatag    |
| RM468     | 3 | 32.68 | cccttctctgttggctac        | tgatttctgagagccaaccc    |
| Indel3-30 | 3 | 33.01 | gccatcttgcatttctct        | ctctgcttttctgcctctt     |
| RM571     | 3 | 33.15 | ggaggtgaaagcgaatcatg      | cctgctgctcttcatcagc     |
| RM514     | 3 | 35.29 | agattgatctcccattcccc      | cacgagcatattactagtgg    |
| RM85      | 3 | 36.35 | ccaaagatgaaacctggattg     | gcacaagggtgagcagctcc    |
| RM335     | 4 | 0.69  | gtacacaccacatcgagaag      | gctctatgcgagtatccatgg   |
| Indel4-3  | 4 | 5.63  | ggcgcctggttcttgaatgt      | aatggttgacttcgacaaaa    |
| Indel4-4  | 4 | 8.24  | ctcacagttctaggcggaaa      | agccgagtagggctgaataa    |
| RM307     | 4 | 13.15 | gtactaccgacctaccgttcac    | ctgctatgcatgaactgctc    |
| RM471     | 4 | 18.99 | acgcacaagcagatgatgag      | gggagaagacgaatgtttgc    |
| RM119     | 4 | 21.41 | catccccctgctgctgctg       | cgccggatgtgtgggactagcg  |
| RM273     | 4 | 24.04 | gaagccgctgtaagttacc       | gttctctacctgacgagc      |
| RM241     | 4 | 27.04 | gagccaaataagatcgctga      | tgcaagcagcagatttagtg    |
| RM17308   | 4 | 27.47 | aggactgaggacggcgaagg      | cgaagaatcccgacactaacg   |
| Indel4-12 | 4 | 28.19 | cgtggcaatatggttcttt       | tcggatacgtaaaacggaaaa   |
| Indel4-13 | 4 | 30.71 | ggattgcttttggcaattt       | ttaacaactggagggggaaa    |
| Indel4-14 | 4 | 33.14 | ggatggtgaggtgaggtgtt      | cgtgttttctccccaatc      |
| Indel4-15 | 4 | 35.17 | atgtaaccggccagagtg        | ccattaactggtcggaatcg    |
| RM280     | 4 | 35.18 | acacgatccactttgcgc        | tgtgtcttgagcagccagg     |
| Indel5-1  | 5 | 0.54  | ccttgatcgattgctctggt      | actttctccgtgttcttgc     |
| RM17818   | 5 | 1.61  | ttgcctcatgtttgcttcatcc    | agctgacaacgacgactgc     |
| RM574     | 5 | 3.45  | ggcgaattcttgcacttgg       | acggtttgtaggggtgcac     |
| Indel5-3  | 5 | 5.55  | gtccccctcaactttctctc      | tcggttgctgaataccttt     |
| RM289     | 5 | 7.81  | ttccatggcacacaagcc        | ctgtgcacgaacttccaaag    |
| Indel5-7  | 5 | 15.75 | aaatttaggccagcagctt       | tctctcacacgcttattcatctt |
| Indel5-8  | 5 | 18.25 | cgtgccgatgacaaaacttc      | gaggatccatgtccaccatt    |
| RM164     | 5 | 19.26 | tctgccccgctactgcagatatcc  | gcagccctaatgctacaattctc |
| RM18749   | 5 | 21.23 | tgagcactctgatctgtctctcacg | aatcaccgattcgtgatctcc   |
| Indel5-10 | 5 | 23.22 | tcgattgagatttgcgat        | tcgtaaccacactgcaactg    |
| RM421     | 5 | 24.04 | agctcaggtgaaacatccac      | atccagaatccattgacccc    |
| RM274     | 5 | 26.91 | cctcgcttatgagagcttgc      | cttctccatcactcccattgg   |
| RM589     | 6 | 1.38  | atcatggtcgggtgcttaac      | caggtccaaccagacactg     |

|           |   |       |                            |                           |
|-----------|---|-------|----------------------------|---------------------------|
| RM190     | 6 | 1.77  | ctttgtctatctcaagacac       | ttgcagatgttcttctgatg      |
| RM19398   | 6 | 2.78  | tcgagtatatacattcgtgtgtgg   | acctcacgtccgtcaggaagc     |
| RM510     | 6 | 2.83  | aaccggattagttctcggc        | tgaggacgacgagcagattc      |
| RM276     | 6 | 6.23  | ctcaacgttgacacctcgtg       | tctccatcgagcagtatca       |
| RM527     | 6 | 9.86  | ggctcgatctagaaaatccg       | ttgcacaggttgcgatagag      |
| Indel6-6  | 6 | 13.17 | cctcatccaggggtcatgta       | cggtaagtgtcatccaggt       |
| Indel6-7  | 6 | 15.62 | gcgattattgagagcgagga       | gcctcttggggaagaacaa       |
| Indel6-8  | 6 | 18.17 | tcacctttatggtgccgaag       | gaagctgcttttgctccac       |
| RM3827    | 6 | 22.30 | taggtaggacctgcttcattgc     | ccctggcctttctcaatctgc     |
| RM20438   | 6 | 25.58 | cacaacgaatgtggtgtgtcc      | cgacatagatgaggccctattcc   |
| RM30      | 6 | 27.25 | ggttaggcacgtcacgg          | tcacctcaccacgacacg        |
| RM400     | 6 | 28.43 | acaccaggctacccaaactc       | cggagagatctgacatgtgg      |
| RM494     | 6 | 31.09 | gggaggggatcgagatagac       | ttaaccttcttccgctcc        |
| RM427     | 7 | 2.68  | tcactagctctgcctgacc        | tgatgagagttggttgcgag      |
| RM125     | 7 | 5.48  | atcagcagccatggcagcgacc     | aggggatcatgtccgaaggcc     |
| RM7121    | 7 | 5.62  | ggagatggcacacgtcaaac       | aggatcccgtttttagcag       |
| RM180     | 7 | 5.74  | ctacatcggcttaggttagcaacacg | acttgcctacttgggtgagggactg |
| RM501     | 7 | 8.01  | gcccattaatgtacagggc        | atatcgtttagccgtgctgc      |
| Indel7-6  | 7 | 13.32 | ccccatgaggcctacactt        | agcagcataatcagatgagacg    |
| RM533     | 7 | 17.51 | gcaactgctctacgcctctc       | cctgaggcttcacctactcg      |
| RM432     | 7 | 18.96 | ttctgtctcacgtggattg        | agctgcgtacgtgatgaatg      |
| RM11      | 7 | 19.26 | tctctcttccccgate           | atagcgggcgaggcttag        |
| RM182     | 7 | 21.51 | tgggatgcagagtgcagttggc     | cgcaggcacggtgccttgaag     |
| RM505     | 7 | 24.53 | agagtatgagccgggtgtg        | gattggcgatcttagcagc       |
| RM234     | 7 | 25.47 | acagtatccaaggccctgg        | cacgtgagacaaagacggag      |
| RM47      | 7 | 25.81 | actccactccactccccac        | gtcagcaggtcggacgtc        |
| Indel7-11 | 7 | 25.93 | gcccactgtcattgagagta       | gttttgccttttgttct         |
| RM1335    | 7 | 28.30 | gcgccattcttgcataattgc      | atcgaacaagaagagtggcttgg   |
| Indel7-12 | 7 | 28.47 | cgctcgtgttttctcgtgat       | gatcggaggcttttgttga       |
| RM172     | 7 | 29.56 | tgcagctgcgccacagccatag     | caaccacgacaccgccgtgttg    |
| Indel7-13 | 7 | 29.66 | tggaggctttctcgtttc         | gaggaagtcgaggatgagga      |
| RM152     | 8 | 0.68  | gaaaccaccacacctcaccg       | ccgtagaccttctgaagtag      |
| RM38      | 8 | 2.12  | acgagctctcgcagccta         | tcggtctccatgtcccac        |
| RM126     | 8 | 5.22  | cgcgtccgcgataaacacaggg     | tcgcacaggtgaggccatgtcg    |
| Indel8-3  | 8 | 5.55  | ttttaaagctgcgcaaaaag       | cataaccggtaaaggagtagcc    |
| RM72      | 8 | 6.76  | ccggcgataaaacaatgag        | gcatcggctctaactaaggg      |
| RM6008    | 8 | 7.61  | cggagaggagaggaggagaagc     | aaccgaagcacatacatcacacg   |
| Indel8-4  | 8 | 8.06  | cgtgcggcttacaagagata       | tgaggcactaatcatcttctctg   |
| Indel8-7  | 8 | 15.60 | ttttaccgtgtcggfactgc       | ctccaaaacagggaccat        |
| Indel8-8  | 8 | 18.09 | ccctccatgttgtgagtcc        | tgattagatccagaaaggagaa    |
| RM1309    | 8 | 19.18 | gaggacactgacgacagcttgg     | cgcgcaaatcattaagtctcag    |
| Indel8-11 | 8 | 25.63 | aaccatgaatgaatccctga       | tgcaactgacatctgcaat       |
| RM447     | 8 | 26.55 | cccttgtcgtctcctctc         | acgggcttctctcctctc        |
| RM264     | 8 | 27.93 | gttgcgtcctactgctacttc      | gatccgtgtcgtatgattagc     |
| Indel8-12 | 8 | 28.12 | tgaattgaacctccgtcctc       | agaactgcaccacgaagctc      |

|            |    |       |                           |                           |
|------------|----|-------|---------------------------|---------------------------|
| RM23662    | 9  | 0.43  | gagaggacgatggcactattgg    | cgaggaacttgattcgcattgg    |
| RM444      | 9  | 5.93  | tgcatcttcaccgtagtcctagc   | cttgctggagctcgtagatgc     |
| Indel9-4   | 9  | 8.08  | gccggccttatccattttt       | gagcgccactgcttctactc      |
| RM296      | 9  | 10.79 | cacatggcaccacactcc        | gccaagtcattcactactctgg    |
| Indel9-6   | 9  | 13.05 | gcatgtatcgtggacatgga      | tccttgatcaacaccgtaaa      |
| RM566      | 9  | 14.71 | acccaactacgatcagctcg      | ctccaggaacacgctctttc      |
| RM434      | 9  | 15.66 | gcctcatcccttaaccctc       | caagaaagatcagtgcggtg      |
| RM242      | 9  | 18.81 | ggccaacgtgtgtatgtctc      | tatatgccaagacggatggg      |
| RM553      | 9  | 19.33 | aactccacatgattccacc       | gagaaggtggtgcagaagc       |
| RM189      | 9  | 22.10 | cgtcttcccaacgctaaaa       | cgccgggcttcgcttc          |
| Indel10-1  | 10 | 0.53  | aattcttatggacggatacgc     | tcagcatctcgtaaagcaaaa     |
| RM474      | 10 | 1.82  | aagatgtacgggtggcattc      | tatgagctggtgagcaatgg      |
| RM216      | 10 | 5.34  | gcatggccgatggtaaag        | tgtataaaaccacacggcca      |
| RM239      | 10 | 9.70  | tacaaaatgctgggtacccc      | acatatgggacccacctg        |
| RM184      | 10 | 16.43 | atccattcgccaaaaccggcc     | tgacactggagagcgggtg       |
| RM25561    | 10 | 17.73 | tactacctccacgcttccatcc    | gcgatttctcgggagttaggg     |
| RM269      | 10 | 18.03 | gaaagcgatcgaaccagc        | gcaaatgcgcctcgtg          |
| RM171      | 10 | 19.12 | aacgcgaggacacgtacttac     | acgagatactgacgcctttg      |
| Indel10-10 | 10 | 23.10 | catgctacagagaggaagc       | acggcgtcttctcggtg         |
| RM590      | 10 | 23.12 | catctccgctctccatgc        | ggagttggggcttctgttcg      |
| RM286      | 11 | 0.38  | ggcttcatcttggcgac         | ccggattcagagataaactc      |
| Indel11-2  | 11 | 3.35  | tgatgagctctcacttgtgaaa    | cgtacattggcttatgtgatctg   |
| RM552      | 11 | 4.84  | cgcagttgtggatttcagtg      | tgctcaacgtttgactgtcc      |
| RM26227    | 11 | 5.35  | caccggagaccagagtagaacg    | ctcaaaactgatcagggctgacc   |
| RM120      | 11 | 5.75  | cacacaagccctgtctcagacc    | cgctgcgtcatgagtatgta      |
| Indel11-3  | 11 | 5.86  | gtgaattcatgacgcgaaga      | agcttgatggatgctcaggt      |
| Indel11-4  | 11 | 8.38  | tgagatgtggccattaagga      | tggcaaaagatcttatatttactcg |
| Indel11-5  | 11 | 10.93 | tctctcaaaatgggacacc       | ataacgcgggacacagaatc      |
| Indel11-7  | 11 | 16.47 | tgataaatccataactaaggatctg | gcttagtccgaggccttca       |
| RM229      | 11 | 18.87 | cactcacacgaacgactgac      | cgcaggttctgtgaaatgt       |
| Indel11-8  | 11 | 18.97 | acggctaaacggtactgcat      | acaccaagggtgaaaagtgg      |
| Indel11-9  | 11 | 21.48 | tgcagtacaacactcagttcaaa   | catgttacggtactggcatca     |
| RM27074    | 11 | 2.98  | ggaggagatatcagcaataagagg  | gaagaagaatcgtggataggc     |
| RM27400    | 12 | 0.11  | ctcgttctctctctcatcacc     | ggtgaagtactcattccgatgg    |
| Indel12-1  | 12 | 0.55  | tctggagagctgcagaaaca      | gcaatctctgcactttgatacc    |
| RM19       | 12 | 2.43  | caaaaacagagcagatgac       | ctcaagatggacccaaga        |
| RM27686    | 12 | 4.69  | atgggaacaacctatcgtctgc    | gagagttgggcttctgttgagg    |
| RM7119     | 12 | 6.70  | ctgagaccatgacgggataaacacc | ggcctcagatcatcaacttgg     |
| RM27791    | 12 | 7.09  | gtgatatgccatgaggcaatgg    | agggtgccacatgacagtttagg   |
| Indel12-5  | 12 | 10.48 | tgggcaactgaatctaacca      | ggagatgatgatcgggtgat      |
| Indel12-6  | 12 | 13.05 | caactaaaaccaacacaaaatcca  | tgtctagtgtcatgtctgagtgc   |
| RM7102     | 12 | 13.21 | ggcggttgcgtttacttggfactcg | ggcgcataggagtgttagagtgc   |
| RM277      | 12 | 18.32 | cggcctcaatcatcacctgac     | caaggcttgaagggaag         |
| RM28448    | 12 | 22.64 | catctttagcttactcctctctcg  | gagatgatccgcttctcttcc     |
| RM3331     | 12 | 23.49 | acgagagggaggagagaaaacg    | ggagagccacaggaacagatcg    |

|            |    |       |                         |                        |
|------------|----|-------|-------------------------|------------------------|
| RM5479     | 12 | 24.41 | ctcaccatagcaatctcctgtgc | acttcgttcaactgcatcatgg |
| RM28621    | 12 | 24.98 | gtgtcaactgtcaacaacacc   | aaggcagggttacatgatagg  |
| RM12       | 12 | 26.99 | tgcctgtattttctctctc     | ggtgatcctttcccattca    |
| RM1296     | 12 | 27.09 | atgttattggtgagaggccaacg | ctgtggaattgaatcctcttcc |
| Indel12-12 | 12 | 27.38 | tgtgcttctggtgaacaactt   | ccaaatggcgggtaatacata  |

---

**Supplemental Table 2.** Analysis of variance for grain traits of the CSSL population across two years  $\times$  three locations

| Source                           | DF  | TGW    |          | LWR  |          | GL   |          | GW   |          |
|----------------------------------|-----|--------|----------|------|----------|------|----------|------|----------|
|                                  |     | MS     | F        | MS   | F        | MS   | F        | MS   | F        |
| CSSL                             | 133 | 36.48  | 60.88**  | 0.33 | 102.07** | 1.44 | 62.94**  | 0.08 | 52.49**  |
| Site                             | 2   | 551.22 | 919.98** | 0.22 | 67.30**  | 1.11 | 48.67**  | 0.29 | 178.97** |
| Year                             | 1   | 284.10 | 474.16** | 0.83 | 255.53** | 6.99 | 306.31** | 0.02 | 11.80**  |
| CSSL $\times$ Site               | 266 | 2.97   | 4.96**   | 0.02 | 5.76**   | 0.10 | 4.33**   | 0.01 | 3.51**   |
| CSSL $\times$ Year               | 133 | 4.25   | 7.09**   | 0.02 | 7.62**   | 0.18 | 8.09**   | 0.01 | 4.19**   |
| Site $\times$ Year               | 2   | 58.47  | 97.58**  | 0.17 | 50.94**  | 2.18 | 95.36**  | 0.12 | 77.40**  |
| CSSL $\times$ Site $\times$ Year | 266 | 2.89   | 4.82**   | 0.01 | 4.03**   | 0.09 | 3.93**   | 0.00 | 2.91**   |

DF: degrees of freedom, MS: mean square, F: F-statistic. The abbreviations for the four traits (TGW, LWR, GL and GW) are the same as those in Table 2. Asterisks indicate significance levels: \*,  $P \leq 0.05$ ; \*\*,  $P \leq 0.01$ .

**Supplemental Table 3.** QTLs of four traits in CSSL population across six environments

| QTL      |    | <i>qTGW4</i> | <i>qTGW5</i> | <i>qTGW3</i> | <i>qTGW8</i> | <i>qLWR1.2</i> | <i>qLWR8</i> | <i>qLWR1.1</i> | <i>qLWR2.2</i> | <i>qLWR3.2</i> | <i>qLWR6</i> | <i>qLWR12</i> | <i>qLWR1.3</i> | <i>qLWR2.1</i> |
|----------|----|--------------|--------------|--------------|--------------|----------------|--------------|----------------|----------------|----------------|--------------|---------------|----------------|----------------|
| Marker   |    | RM280        | Indel5-10    | RM411        | Indel8-3     | RM128          | RM126        | RM3740         | Indel2-9       | Indel3-11      | RM30         | RM28621       | Indel1-16      | Indel2-8       |
| LOD      | E1 | 0.69         | 1.84         | <b>5.82</b>  | <b>4.72</b>  | 2.22           | 1.33         | <b>4.59</b>    | 1.76           | 0.28           | 0.18         | 2.04          | 1.55           | 1.40           |
|          | E2 | <b>3.05</b>  | 2.67         | 0.62         | 0.53         | 1.30           | 1.45         | 1.60           | 1.28           | 0.70           | <b>4.57</b>  | 1.46          | 1.25           | 0.92           |
|          | E3 | 2.15         | <b>3.65</b>  | 0.11         | 0.02         | <b>3.38</b>    | <b>4.54</b>  | 1.26           | 0.10           | 1.10           | 0.06         | <b>3.11</b>   | 0.05           | <b>7.05</b>    |
|          | E4 | 2.60         | 1.16         | 0.09         | 0.55         | 0.00           | <b>6.31</b>  | 1.57           | <b>3.60</b>    | <b>3.58</b>    | 0.29         | <b>3.51</b>   | <b>6.18</b>    | 0.09           |
|          | E5 | <b>3.67</b>  | 1.02         | 0.12         | 0.69         | 2.55           | <b>6.20</b>  | 2.01           | <b>5.44</b>    | 2.35           | <b>3.14</b>  | 1.73          | 1.27           | 0.02           |
|          | E6 | <b>3.87</b>  | 1.01         | 0.03         | 0.29         | <b>3.49</b>    | 1.22         | <b>3.86</b>    | 1.46           | 2.86           | 0.51         | 2.02          | 0.32           | 1.96           |
| P-values | E1 | 0.999        | 0.515        | <b>0.000</b> | <b>0.004</b> | 0.375          | 0.869        | <b>0.005</b>   | 0.621          | 1.000          | 1.000        | 0.454         | 0.738          | 0.832          |
|          | E2 | <b>0.048</b> | 0.148        | 1.000        | 1.000        | 0.882          | 0.802        | 0.712          | 0.890          | 0.998          | <b>0.006</b> | 0.794         | 0.903          | 0.989          |
|          | E3 | 0.323        | <b>0.021</b> | 1.000        | 1.000        | <b>0.043</b>   | <b>0.007</b> | 0.899          | 1.000          | 0.958          | 1.000        | <b>0.049</b>  | 1.000          | <b>0.000</b>   |
|          | E4 | 0.157        | 0.934        | 1.000        | 1.000        | 1.000          | <b>0.000</b> | 0.727          | <b>0.030</b>   | <b>0.031</b>   | 1.000        | <b>0.036</b>  | <b>0.000</b>   | 1.000          |
|          | E5 | <b>0.019</b> | 0.974        | 1.000        | 0.999        | 0.206          | <b>0.000</b> | 0.467          | <b>0.001</b>   | 0.304          | <b>0.050</b> | 0.638         | 0.895          | 1.000          |
|          | E6 | <b>0.014</b> | 0.976        | 1.000        | 1.000        | <b>0.036</b>   | 0.916        | <b>0.019</b>   | 0.794          | 0.105          | 1.000        | 0.462         | 1.000          | 0.503          |
| PVE(%)   | E1 | 1.72         | 4.58         | <b>16.53</b> | <b>12.44</b> | 5.62           | 3.37         | <b>12.91</b>   | 4.44           | 0.73           | 0.48         | 5.12          | 3.92           | 3.73           |
|          | E2 | <b>8.17</b>  | 7.43         | 1.50         | 1.33         | 3.47           | 3.85         | 4.25           | 3.40           | 1.90           | <b>13.49</b> | 3.88          | 3.35           | 2.60           |
|          | E3 | 6.37         | <b>12.38</b> | 0.33         | 0.07         | <b>5.69</b>    | <b>7.58</b>  | 1.90           | 0.15           | 1.69           | 0.09         | <b>5.08</b>   | 0.08           | <b>12.79</b>   |
|          | E4 | 8.54         | 3.69         | 0.29         | 1.75         | 0.00           | <b>11.14</b> | 2.42           | <b>6.06</b>    | <b>6.11</b>    | 0.45         | <b>5.89</b>   | <b>10.89</b>   | 0.14           |
|          | E5 | <b>11.18</b> | 2.70         | 0.36         | 2.00         | 5.18           | <b>14.66</b> | 4.11           | <b>12.69</b>   | 4.86           | <b>6.74</b>  | 3.55          | 2.64           | 0.04           |
|          | E6 | <b>11.26</b> | 2.78         | 0.09         | 0.81         | <b>8.37</b>    | 2.66         | <b>9.19</b>    | 3.18           | 6.74           | 1.12         | 4.36          | 0.71           | 4.45           |

**Supplemental Table 3.** QTLs of four traits in CSSL population across six environments

(continuous table)

| QTL      |    | <i>qLWR3.1</i> | <i>qLWR3.3</i> | <i>qLWR9</i> | <i>qGL12.2</i> | <i>qGL3.2</i> | <i>qGL4</i>  | <i>qGL12.1</i> | <i>qGL2</i>  | <i>qGL10</i> | <i>qGL3.1</i> | <i>qGW4</i>  | <i>qGW9</i>  | <i>qGW1.2</i> |
|----------|----|----------------|----------------|--------------|----------------|---------------|--------------|----------------|--------------|--------------|---------------|--------------|--------------|---------------|
| Marker   |    | Indel3-3       | Indel3-17      | RM553        | RM28621        | Indel3-17     | RM280        | RM277          | Indel2-8     | RM171        | Indel3-3      | RM119        | RM553        | Indel1-16     |
| LOD      | E1 | <b>3.97</b>    | 0.34           | 0.35         | 2.84           | 0.59          | 0.17         | 0.00           | 0.50         | 0.57         | <b>4.28</b>   | 0.01         | <b>3.74</b>  | 0.86          |
|          | E2 | 0.50           | 1.05           | 1.43         | <b>6.40</b>    | 1.51          | 0.81         | 0.57           | 0.24         | 0.38         | 1.16          | 0.33         | <b>5.13</b>  | 0.51          |
|          | E3 | 0.69           | 2.25           | <b>4.30</b>  | 1.38           | <b>5.90</b>   | 1.29         | <b>5.65</b>    | <b>6.71</b>  | <b>5.90</b>  | 0.04          | 0.37         | <b>3.03</b>  | 0.43          |
|          | E4 | 0.50           | <b>4.32</b>    | 1.51         | <b>3.24</b>    | <b>5.41</b>   | <b>3.41</b>  | <b>4.19</b>    | 1.62         | 1.70         | 1.02          | <b>3.82</b>  | 1.08         | <b>8.35</b>   |
|          | E5 | 0.63           | 0.75           | 1.99         | <b>9.70</b>    | 0.40          | <b>3.76</b>  | 1.51           | 0.60         | 0.55         | 0.46          | <b>6.40</b>  | 0.37         | 0.85          |
|          | E6 | 0.34           | 1.75           | 1.24         | <b>5.94</b>    | 3.02          | <b>3.86</b>  | 2.01           | 1.34         | 1.16         | 0.91          | <b>3.84</b>  | 0.96         | <b>6.90</b>   |
| P-values | E1 | <b>0.017</b>   | 1.000          | 1.000        | 0.199          | 1.000         | 1.000        | 1.000          | 1.000        | 1.000        | <b>0.011</b>  | 1.000        | <b>0.026</b> | 0.994         |
|          | E2 | 1.000          | 0.971          | 0.814        | <b>0.000</b>   | 0.793         | 0.998        | 1.000          | 1.000        | 1.000        | 0.949         | 1.000        | <b>0.002</b> | 1.000         |
|          | E3 | 0.999          | 0.363          | <b>0.009</b> | 0.861          | <b>0.001</b>  | 0.904        | <b>0.001</b>   | <b>0.000</b> | <b>0.001</b> | 1.000         | 1.000        | <b>0.054</b> | 1.000         |
|          | E4 | 1.000          | <b>0.008</b>   | 0.762        | <b>0.048</b>   | <b>0.002</b>  | <b>0.045</b> | <b>0.014</b>   | 0.735        | 0.690        | 0.982         | <b>0.023</b> | 0.958        | <b>0.000</b>  |
|          | E5 | 1.000          | 0.999          | 0.484        | <b>0.000</b>   | 1.000         | <b>0.031</b> | 0.793          | 1.000        | 1.000        | 1.000         | <b>0.000</b> | 1.000        | 0.995         |
|          | E6 | 1.000          | 0.628          | 0.907        | <b>0.001</b>   | 0.067         | <b>0.029</b> | 0.516          | 0.884        | 0.949        | 0.995         | <b>0.023</b> | 0.985        | <b>0.000</b>  |
| PVE(%)   | E1 | <b>11.06</b>   | 0.85           | 0.90         | 8.09           | 1.49          | 0.46         | 0.00           | 1.35         | 1.53         | <b>12.50</b>  | 0.02         | <b>7.86</b>  | 1.68          |
|          | E2 | 1.36           | 2.94           | 3.70         | <b>19.87</b>   | 4.07          | 2.23         | 1.59           | 0.68         | 1.05         | 3.16          | 0.63         | <b>11.14</b> | 0.98          |
|          | E3 | 1.06           | 3.67           | <b>6.99</b>  | 2.45           | <b>11.94</b>  | 2.29         | <b>11.39</b>   | <b>14.47</b> | <b>11.90</b> | 0.07          | 1.02         | <b>8.60</b>  | 1.18          |
|          | E4 | 0.79           | <b>7.25</b>    | 2.35         | <b>7.14</b>    | <b>12.09</b>  | <b>7.53</b>  | <b>9.17</b>    | 3.43         | 3.44         | 2.09          | <b>7.66</b>  | 2.04         | <b>18.16</b>  |
|          | E5 | 1.33           | 1.58           | 4.16         | <b>24.29</b>   | 0.85          | <b>8.48</b>  | 2.97           | 1.29         | 1.15         | 0.97          | <b>12.62</b> | 0.65         | 1.48          |
|          | E6 | 0.76           | 4.11           | 2.72         | <b>14.85</b>   | <b>7.22</b>   | <b>9.30</b>  | 4.37           | 3.06         | 2.56         | 2.02          | <b>8.41</b>  | 1.95         | <b>15.97</b>  |



Supplemental Table 3. QTLs of four traits in CSSL population across six environments

(continuous table)

| QTL      |    | <i>qGW8.1</i> | <i>qGW8.3</i> | <i>qGW1.1</i> | <i>qGW2</i>  | <i>qGW3.1</i> | <i>qGW3.2</i> | <i>qGW6</i>  | <i>qGW8.4</i> | <i>qGW8.2</i> | <i>qGW11</i> | <i>qGW12</i> |
|----------|----|---------------|---------------|---------------|--------------|---------------|---------------|--------------|---------------|---------------|--------------|--------------|
| Marker   |    | RM126         | Indel8-11     | RM3740        | RM110        | Indel3-26     | RM85          | RM589        | RM264         | RM6008        | RM27074      | RM7119       |
| LOD      | E1 | <b>4.71</b>   | 0.08          | 0.52          | 0.53         | 0.33          | <b>4.07</b>   | 0.06         | <b>3.85</b>   | 0.25          | 0.75         | 1.24         |
|          | E2 | 1.22          | 0.22          | 0.76          | 0.31         | 0.57          | 0.00          | 1.63         | 1.98          | <b>5.75</b>   | 0.00         | <b>4.20</b>  |
|          | E3 | 0.83          | 1.57          | 0.85          | 0.02         | 0.16          | 0.02          | 1.15         | 1.36          | 0.52          | 0.01         | 0.37         |
|          | E4 | 0.56          | 2.71          | <b>4.74</b>   | 1.76         | 1.23          | 0.51          | <b>3.27</b>  | 0.25          | 0.01          | <b>3.66</b>  | 0.42         |
|          | E5 | <b>6.10</b>   | <b>3.35</b>   | 1.36          | <b>5.94</b>  | 1.07          | 0.01          | 0.86         | 0.63          | 0.48          | 0.66         | 0.67         |
|          | E6 | 1.23          | <b>4.06</b>   | 1.42          | 0.56         | <b>3.33</b>   | 0.25          | 0.81         | 0.48          | 1.94          | 0.91         | 0.64         |
| P-values | E1 | <b>0.003</b>  | 1.000         | 1.000         | 1.000        | 1.000         | <b>0.016</b>  | 1.000        | <b>0.022</b>  | 1.000         | 0.999        | 0.904        |
|          | E2 | 0.913         | 1.000         | 0.999         | 1.000        | 1.000         | 1.000         | 0.673        | 0.450         | <b>0.001</b>  | 1.000        | <b>0.013</b> |
|          | E3 | 0.997         | 0.708         | 0.995         | 1.000        | 1.000         | 1.000         | 0.940        | 0.837         | 1.000         | 1.000        | 1.000        |
|          | E4 | 1.000         | 0.154         | <b>0.003</b>  | 0.584        | 0.909         | 1.000         | <b>0.049</b> | 1.000         | 1.000         | <b>0.031</b> | 1.000        |
|          | E5 | <b>0.000</b>  | <b>0.047</b>  | 0.837         | <b>0.001</b> | 0.961         | 1.000         | 0.994        | 1.000         | 1.000         | 1.000        | 1.000        |
|          | E6 | 0.909         | <b>0.016</b>  | 0.794         | 1.000        | <b>0.047</b>  | 1.000         | 0.997        | 1.000         | 0.476         | 0.990        | 1.000        |
| PVE(%)   | E1 | <b>10.15</b>  | 0.16          | 1.01          | 1.03         | 0.65          | <b>8.70</b>   | 0.11         | <b>8.39</b>   | 0.49          | 1.48         | 2.42         |
|          | E2 | 2.31          | 0.43          | 1.44          | 0.60         | 1.10          | 0.00          | 3.06         | 4.08          | <b>12.27</b>  | 0.00         | <b>8.72</b>  |
|          | E3 | 2.26          | 4.21          | 2.30          | 0.05         | 0.45          | 0.05          | 3.10         | 3.73          | 1.42          | 0.04         | 1.01         |
|          | E4 | 1.04          | 5.33          | <b>9.67</b>   | 3.21         | 2.27          | 0.90          | <b>6.48</b>  | 0.48          | 0.01          | <b>7.53</b>  | 0.00         |
|          | E5 | <b>11.96</b>  | <b>6.26</b>   | 2.35          | <b>11.61</b> | 1.86          | 0.01          | 1.49         | 1.13          | 0.84          | 1.18         | 1.18         |
|          | E6 | 2.47          | <b>8.94</b>   | 2.85          | 1.13         | <b>7.23</b>   | 0.50          | 1.64         | 1.01          | 3.85          | 1.86         | 1.30         |

LOD: LOD score; PVE: percentage of variance explained; P-values: the genome-wide P-value; in bold type when  $P \leq 0.05$ ; the abbreviation for the four traits (TGW, LWR, GL and GW) are the same as those in Table 2. Naming of six environments is the same as Table 1.
